# Supplementary material for: Phylogenetic Relationships in Orobanchaceae Inferred From Low-Copy Nuclear Genes: Consolidation of Major Clades and Identification of a Novel Position of the Non-photosynthetic Orobanche Clade Sister to All Other Parasitic Orobanchaceae
Source: Front Plant Sci. 2019 Jul 16;10:902. doi: 10.3389/fpls.2019.00902 (PMC6646720; doi:10.3389/fpls.2019.00902)
Supplement: TABLE S1 — List of taxa, locality and voucher information, and sequence source (GenBank accession numbers or other databases). [file Table_1.xlsx]

## Sheet: Table S1
Table S1 List of taxa, locality and voucher information, and sequence source (GenBank accession numbers or other databases)
Taxon	Herbarium code1 / Database	AT1G04780	AT1G14610	Agt1	AT2G37230	AT1G09680	PHYA	PHYB	ITS	matK	rps2
Rehmannia-Triaenophora Clade
Rehmannia piasezkii	China, Hubei, Yichang (HIB: X.D. Li & X. Li Li101)	MK588498	MK588565	MK588450	MK588586	MK588459	MK588408	MK588418	DQ069316	MK588422	FJ172707	1	1	1
Triaenophora shennongjiaensis	China, Hubei, Yichang (HIB: X.D. Li & X. Li Li102)	MK588500	MK588566	MK588451	MK588588	MK588460	MK588409		FJ172741	MK588423	FJ172717	1	1	1
Lindenbergia Clade												0	0	0
Lindenbergia muraria	Germany, botanical garden Münster (BG Münster 19561)	MK588510	MK588567			MK588475	AM233977	KC542235	KC480289	KC542165	JX023010	1	1	1
Lindenbergia philippensis	PennState University, USA (cultivated; PAC: S. Wicke LP60/LP61)	MK588511	MK588568	MK588452	MK588599	MK588476	AM233978	KC542236	EU259247	AF051990	AF055151	1	1	1
Cymbaria-Siphonostegia Clade												0	0	0
Bungea trifida	Turkey, Erzincan (WU: C. Gilli & P. Schönswetter 100-240)	MK588506	MK588564	MK588429	MK588594	MK588477	AM233936	MK588410	KC480307	KC542151	JX022980	1	1	1
Schwalbea americana	Newton, GA, USA (PAC: S. Wicke & C. dePamphilis SA 57)	MK588509	MK588559	MK588440	MK588597	MK588478	AM234017	KC542270	KC480394	AF051998	AF055150	1	1	1
Orobanche Clade												0	0	0
Boschniakia himalaica	China, Yunnan, Yulong snow Mountain (KUN: H.Wang YWB2013057)	MK588497			MK588585	MK588455	KC542187	KC542204	AY911212	JX091311	DQ403780	1	1	1
Cistanche phelypaea	Spain, Canary Islands, Lanzarote (herb. Sánchez Pedraja: G. Moreno Moral MM0038)	MK588507	MK588569		MK588595	MK588456			LT715456	JX091317	JX022987	1	1	1
Cistanche tubulosa	China, Xinjiang, Cele (HIB: Y.X. Sun Sun201103)	MK588508	MK588570		MK588596	MK588457			KY753809	KY863538	KY753796	1	1	1
Epifagus virginiana	USA, NH, Dublin (HUH: Boufford et al 42939)	MK588499	MK588558	MK588430	MK588587		AM234039	KC542221	AY209290	M81884	M81884	1	1	1
Orobanche caryophyllacea	Ukraine, Carpathians (Roman Kish: 2006)	MK588512	MK588560		MK588600	MK588469		MK588412	AY209237	AF051992	AF055145	1	1	1
Orobanche flava	Slovakia, Ždiar (WU: C. Pachschwöll CP1069)	MK588513	MK588562	MK588453	MK588601	MK588470	MK588402	MK588413	KY218652	MK588420	DQ310029	1	1	1
Orobanche gracilis	Spain, Palencia, La Pernía (herb. Sánchez Pedraja: G. Moreno Moral MM0110/2007)	MK588515	MK588563		MK588603	MK588472	AM233993	MK588419	JX193303	HG803179	DQ310030	1	1	1
Orobanche lycoctoni	Spain, Picos de Europa (MA: 689996)	MK588514	MK588561		MK588602	MK588471	MK588403	MK588414	AY960724	MK588421		1	1	0
Phelipanche aegyptiaca	PPGP2	BC4_3282	BC4_38149	BC4_47726	GnB1_18904	BC4_487068			KC811153	KU212370	KC815023	1	1	1
Phelipanche arenaria	Austria, Wachau (WU: C. Pachschwöll CP1068)	MK588501	MK588557						KY513949		DQ310046	1	0	1
Incertae sedis												0	0	0
Brandisia hancei	China, Yunnan, Songming (KUN: H.Wang YWB2013015)	MK588502	MK588548	MK588424	MK588590	MK588458	AM233934 & AM234037	KC542208	EU366159	KC542149	JX022978	1	1	1
Pterygiella Clade												0	0	0
Phtheirospermum tenuisectum	China, Yunnan, Zhongdian (HUH: Boufford et al 42135)	MK588503	MK588549		MK588591			MK588415	AY949708	AY949770	MK588400	1	1	1
Pterygiella cylindrica	China, Yunnan, Daju (KUN: H.Wang YWB2013167)	MK588504	MK588550	MK588448	MK588592	MK588473	MK588406	MK588416	GU445320	JF955836	MK588399	1	1	1
Pterygiella duclouxii	China, Yunnan, Elephant Mountain (KUN: H.Wang YWB2013166)	MK588505	MK588551	MK588449	MK588593	MK588474	MK588407	MK588417	GU445321	JF955839	MK588398	1	1	1
Castilleja-Pedicularis Clade												0	0	0
Pedicularis aspleniifolia	Austria, Steiermark, Schladminger Tauern (WU: D. Pan & G.M. Schneeweiss 107)	MK588528	MK588553	MK588441	MK588616	MK588461			HG424080			1	0	0
Pedicularis decora	China, Hubei, Shennongjia (HIB: X.D. Li & X. Li Li106)	MK588531		MK588443	MK588619	MK588463			JF977537	JF955130		1	1	0
Pedicularis densispica	China, Yunnan, Yulong snow Mountain (KUN: H.Wang YWB2013058)	MK588533	MK588571	MK588445	MK588621	MK588465	AM234002	KC542255	KC480379	AY949718	KC480430	1	1	1
Pedicularis elwesii	China, Yunnan, Yulong snow Mountain (KUN: H.Wang YWB2013091)	MK588530	MK588552	MK588444	MK588618	MK588466	MK588404	KC542256	AY949649	AY949723	JX023022	1	1	1
Pedicularis lachnoglossa	China, Yunnan, Yulong snow Mountain (KUN: H.Wang YWB2013092)	MK588532	MK588555	MK588446	MK588620	MK588464			JF977606	JF955198		1	1	0
Pedicularis rex	China, Yunnan, Fuming old green Mountain (KUN: H.Wang YWB2013154)		MK588556			MK588467			MH117641	MH116744		1	1	0
Pedicularis rostratospicata	Austria, Steiermark, Schladminger Tauern (WU: D. Pan & G.M. Schneeweiss 97)	MK588529	MK588554	MK588442	MK588617	MK588462						0	0	0
Pedicularis verticillata	Austria, Steiermark, Schnaalpe (WU: D. Pan G.M. Schneeweiss 117)	MK588534		MK588447	MK588582	MK588468	MK588405		AY596818	AY949762		1	1	0
Triphysaria pusilla	PPGP2	BC1_8008		BC1_880		BC1_14880 & 17241	AM234032	KC542291	AF478943			1	0	0
Triphysaria versicolor	PPGP2	BC2_248550	BC2_16026	GnuB1_77562	BC2_26606	BC2_252996			FJ939254	ANX10153	AF055137	1	1	1
Euphrasia-Rhinanthus Clade												0	0	0
Bellardia trixago	Spain, Burgos (SALA 142076: D. Pinto Carrasco & al. DP 918)		MK588535		MK588579	MK588484	AM233930	KC542203	FJ790053	JX091310	JX022974	1	1	1
Euphrasia frigida	Unknown (E. Fischer 107)	MK588516	MK588545	MK588431	MK588604				MH202586	MH202326		1	1	0
Euphrasia sinuata	Austria, Tirol, Kitzbühler Alpen (WU: D. Pan & G.M. Schneeweiss 120)		MK588547	MK588432	MK588589	MK588487						0	0	0
Euphrasia stricta	Unknown (E. Fischer; isolate LE 568)		MK588546		MK588598		AM233962 & AM233961	MK588411	FJ790051	FJ790111	FJ600693	1	1	1
Lathraea squamaria	Austria, Vienna, HBV (cultivated)	MK588526	MK588543	AM503659	MK588614	MK588488	AM233973	KC542234		HM193524	KC480424	0	1	1
Macrosyringion longiflorum	Spain, Burgos (SALA 135639: D. Pinto Carrasco & al. DP 11)	MK588517	MK588536	MK588439	MK588605				MF444553	KX959135		1	1	0
Melampyrum sylvaticum	Austria, Carinthia, Hohe Tauern (WU: D. Pan & G.M. Schneeweiss 119)		MK588578	AM503643	MK588581	MK588490	AM233982		AY911232	FJ790104	AF055148	1	1	1
Nothobartsia asperrima	Morocco, Chauen (SALA 156176: D. Pinto Carrasco & al. DP 1062)	MK588521	MK588540	MK588433	MK588609	MK588485			KX958709	KX959206		1	1	0
Odontitella virgata	Spain, Burgos (SALA 135636: D. Pinto Carrasco & al. DP 14)	MK588524	MK588541	MK588434	MK588612	MK588486			MF444469	KX959081		1	1	0
Odontites bolligeri	Spain, Granada (SALA 110065: D. Pinto Carrasco & al. DP 1036)	MK588518	MK588537	MK588436	MK588606	MK588479			MF444539	KX959232		1	1	0
Odontites cebennensis	Spain, Barcelona (SALA 135679: D. Pinto Carrasco & al. DP 628)	MK588519	MK588539		MK588607	MK588481			MF444483	KX959238		1	1	0
Odontites luteus	Spain, Soria (SALA 142135: D. Pinto Carrasco DP 1040)	MK588522		MK588435	MK588610	MK588482			MF444562	KX959216		1	1	0
Odontites vernus	Spain, Burgos (SALA 135638: D. Pinto Carrasco DP 12)	MK588523		MK588437	MK588611	MK588483			FJ790048	KX959244		1	1	0
Odontites viscosus	Spain, Burgos (SALA 135637: D. Pinto Carrasco DP 13)	MK588520	MK588538		MK588608	MK588480			MF444502	KX959234		1	1	0
Parentucellia latifolia	Spain, Cáceres (SALA 142077: M. Martínez Ortega & X. Giráldez Fernández MO 6019)	MK588525	MK588542	MK588438	MK588613		AM233999	KC542253	HM193530	HM193526	JX023019	1	1	1
Parentucellia viscosa	Spain, Cáceres (SALA 142079: M. Martínez Ortega & X. Giráldez Fernández MO 6021)				MK588584		AM234000	KC542254	HM193529	AY849606	U48753	1	1	1
Rhinanthus alectorolophus	Germany, Baden-Württemberg (MSUN: S. Wicke 5.7.12)	MK588527	MK588544	AM503660	MK588615	MK588489	AM234012	KC542265	FJ790042	FJ790102	KC480434	1	1	1
Striga-Alectra Clade												0	0	0
Aeginetia indica	China, Jiangxi, Lushan (HIB: Y.S. Peng Peng201201)	MK588491			MK588626-MK588629cl		AM233920	AM233920	AY596819			1	0	0
Buchnera americana	USA, Alabama (MSUN: K. Müller & S. Wicke s. n.)	MK588492	MK588572	MK588425	MK588580		KC542188	KC542209	KC480306	KC542150		1	1	0
Buchnera hispida	Madagascar (KOBL: E. Fischer 10295)	MK588493	MK588573						EU259261	FR728648	MK588401	1	1	1
Radamaea montana	Madagascar (KOBL: E. Fischer 10292)	MK588496		MK588426	MK588622-MK588625cl	MK588454	AM234044 & AM234011	KC542264	KC480389	FR728639	KC480433	1	1	1
Striga bilabiata	Possibly Ruanda (E. Fischer; isolate LE 466)	MK588494	MK588577cl	MK588427	MK588630-MK588632cl		AM234025	KC542274	AY911255	JX091336	JX023035	1	1	1
Striga gesnerioides	USA, Florida, Lake County (FLAS 220552: S.F. Brockington 380)	MK588495	MK588574-MK588576cl	MK588428	MK588583		AM234029 & AM234026	KC542275	EU140575	FR728646	U48747	1	1	1
Striga hermonthica	PPGP2	BC2_299603	BC2_31411	BC1_408	BC2_298151 & 328344	BC2_291302			MG523353	ANX10310	ANX10298	1	1	1
Out-groups												0	0	0
Paulownia fargesii / P. tomentosa	1KP3	2005827	2006975	2006699	2084310 & 2013298	2017594 & 2016330	AM234001	KC542195 & KC542195		AF051997	KP718624	0	1	1
Mimulus guttatus	Phytozome4	7	12	14	10	11			AY575439	KU705476	KU705476	1	1	1
Total number		50	47	39	51	43	31	30	52	50	36	52	50	36
1voucher information only applies to newly obtained sequences (GenBank numbers MK588398-MK588632)									18	16	5
2EST libraries or combined builds obtained from the Parasitic Plant Genome Project (PPGP) database (available from: http://ppgp.huck.psu.edu/)
3sequences of P. fargesii from the 1KP database (http://www.onekp.com/public_data.html; assessed on Feb 27th 2017); number refers to the scaffold number (e.g., scaffold-UMUL-2005827)
4sequences from Phytozome 12.1 database (https://phytozome.jgi.doe.gov/pz/portal.html#; assessed on Feb 27th 2017); numbers refer to the scaffold number (e.g., scaffold_7)
